# Supplementary material for: Structure and immunostimulatory activity studies on two novel Flammulina velutipes polysaccharides: revealing potential impacts of →6)-α-d-Glcp(1→ on the TLR-4/MyD88/NF-κB pathway
Source: Royal Society of Chemistry journal article supplement (doi:10.1039/d3fo05468c), 2024-01-01

***SUPPLEMENTARY MATERIAL***

**Supplementary Material-Tables:**

**Table S1.** Gradient elution procedures of HPLC for the determination of uronic acid.

| Time (min) | Deionized water (%) | Acetonitrile B (%) | Flow rate (mL/min) |
|------------|---------------------|--------------------|--------------------|
| 3          | 25                  | 75                 | 0.8                |
| 6          | 40                  | 60                 | 0.8                |
| 9          | 40                  | 60                 | 0.8                |
| 15         | 25                  | 75                 | 1.4                |

**Table S2.** Primer sequence of target gene.

| <b>Gene</b>    | <b>Primer sequences</b>                            |
|----------------|----------------------------------------------------|
| $\beta$ -actin | <b>Forward primer</b><br>AGGGAAATCGTGCGTGACAT      |
|                | <b>Reverse primer</b><br>AACCGCTCGTTGCCAATAGT      |
| TLR4           | <b>Forward primer</b><br>TGTGTCAGTGGTCAGTGTGATTGTG |
|                | <b>Reverse primer</b><br>CTGTAGTGAAGGCAGAGGTGAAAGC |
| MyD88          | <b>Forward primer</b><br>CGCCGCCTATCGCTGTTCTTG     |
|                | <b>Reverse primer</b><br>TGCCTCCCAGTTCCTTTGTTTGTG  |
| NF- $\kappa$ B | <b>Forward primer</b><br>GAGACTGATCGGGAATTGCCTGAC  |
|                | <b>Reverse primer</b><br>ATCACCTACGCTCAGCCTCACC    |
| IL-1 $\beta$   | <b>Forward primer</b><br>CACTACAGGCTCCGAGATGAACAAC |
|                | <b>Reverse primer</b><br>TGTCGTTGCTTGGTTCTCCTTGAC  |
| IL-6           | <b>Forward primer</b><br>CTTCTGGGACTGATGCTGGTGAC   |
|                | <b>Reverse primer</b><br>TCTGTTGGGAGTGGTATCCTCTGTG |
| TNF- $\alpha$  | <b>Forward primer</b><br>ACGGCATGGATCTCAAAGACAACC  |
|                | <b>Reverse primer</b><br>GTACTTGGGCAGATTGACCTCAGC  |
| NOS2           | <b>Forward primer</b><br>ATCTTGGAGCGAGTTGTGGATTGTC |
|                | <b>Reverse primer</b><br>TAGGTGAGGGCTTGGCTGAGTG    |

## **Supplementary Material-Figures:**

### **Supplementary Figure captions:**

**Fig. S1.** Scheme of extraction and purification.

**Fig. S2.** HPLC spectrum of of FVPH1 (A) FVPH2 (B) and FVPH3 (C).

**Fig. S3.** Relative survival rate of RAW264.7 cells after treatment with FVPH1, FVPH2 and FVPH3.

**Fig. S4.** Fructose detection spectrum (A), uronic acid detection spectrum (B), and gas chromatography spectrum (C).

**Fig. S5.**  $^{13}\text{C}$  spectrum of FVPH1.

**Fig. S6.** H/H-COSY spectrum of FVPH1.

**Fig. S7.** HMBC spectrum of FVPH1.

**Fig. S8.**  $^{13}\text{C}$  spectrum of FVPH2.

**Fig. S9.** H/H-COSY spectrum of FVPH2.

**Fig. S10.** HMBC spectrum of FVPH2.

**Fig. S11.** Raw images of Western Blot .(H1L:FVPH1 of 100  $\mu\text{g}/\text{mL}$ . H1M:FVPH1 of 200  $\mu\text{g}/\text{mL}$ . H1H:FVPH1 of 400  $\mu\text{g}/\text{mL}$ . H2L:FVPH2 of 100  $\mu\text{g}/\text{mL}$ . H2M:FVPH2 of 200  $\mu\text{g}/\text{mL}$ . H2H:FVPH2 of 400  $\mu\text{g}/\text{mL}$ ).

Fig. S1

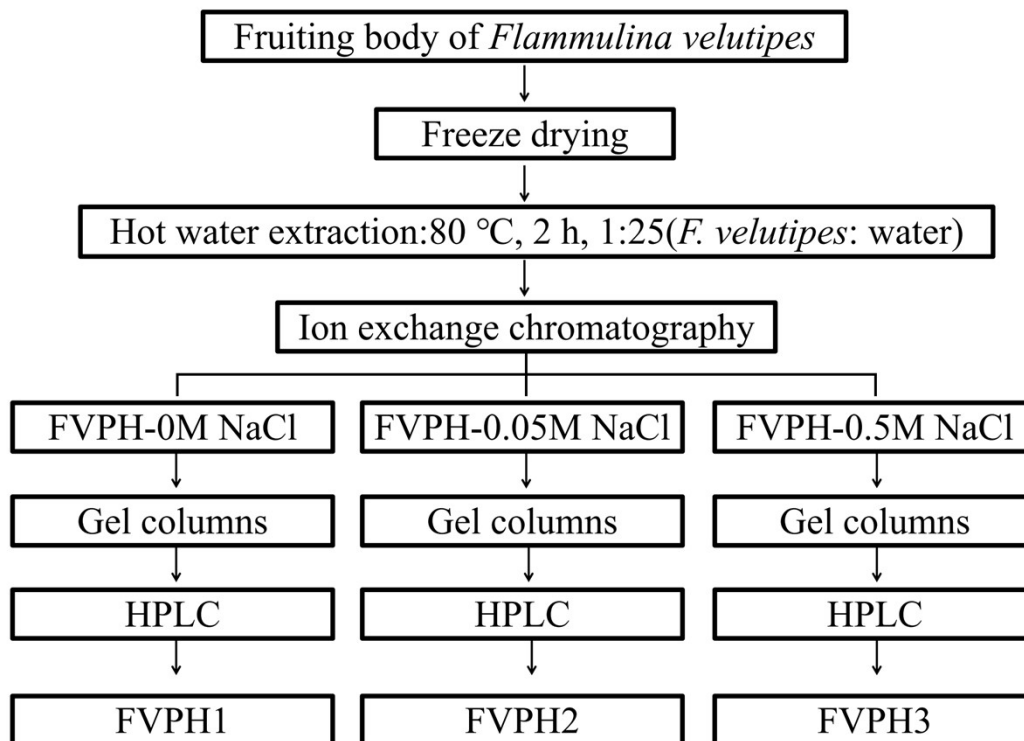

**Fig. S2**

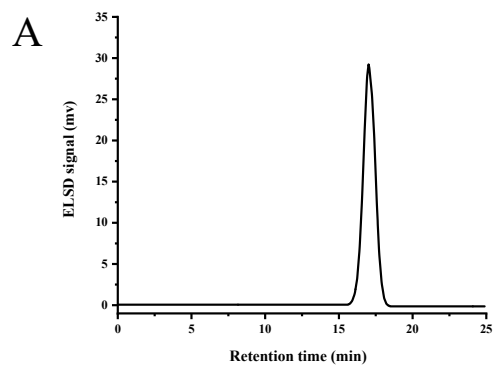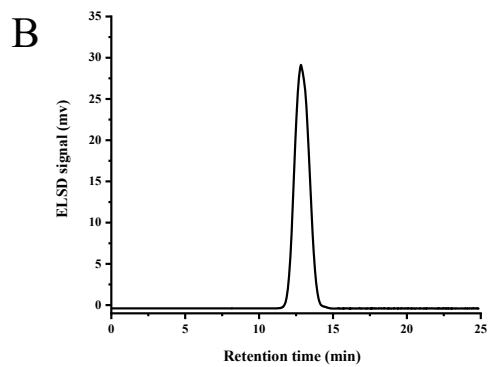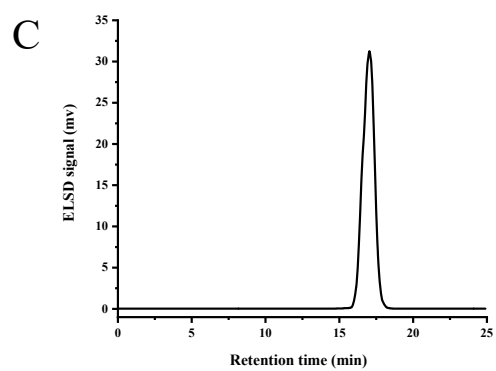

Fig. S3

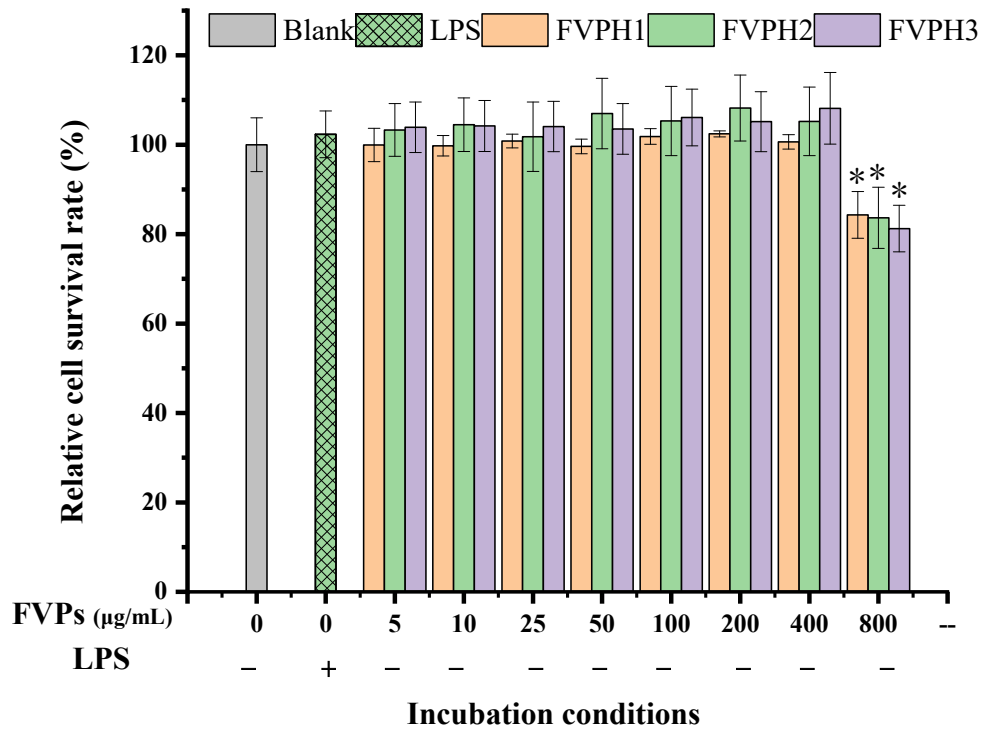

Fig. S4

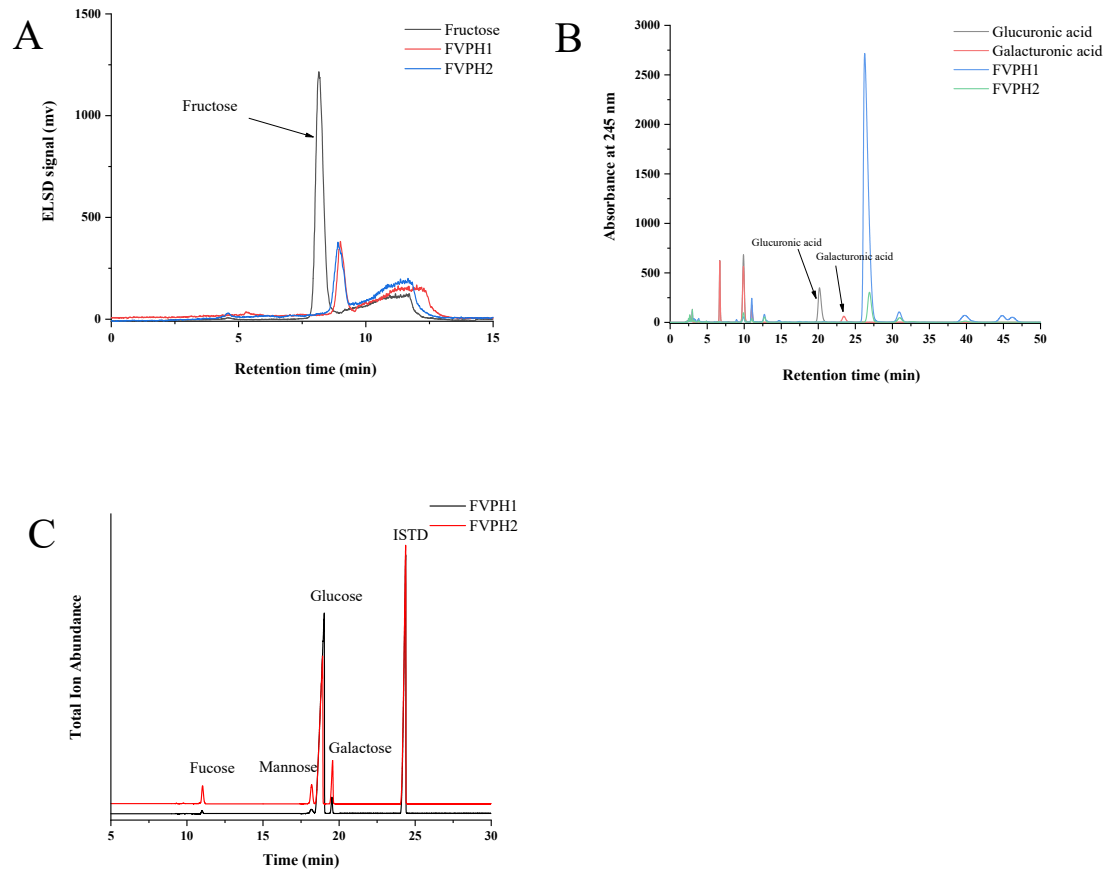

Fig. S5

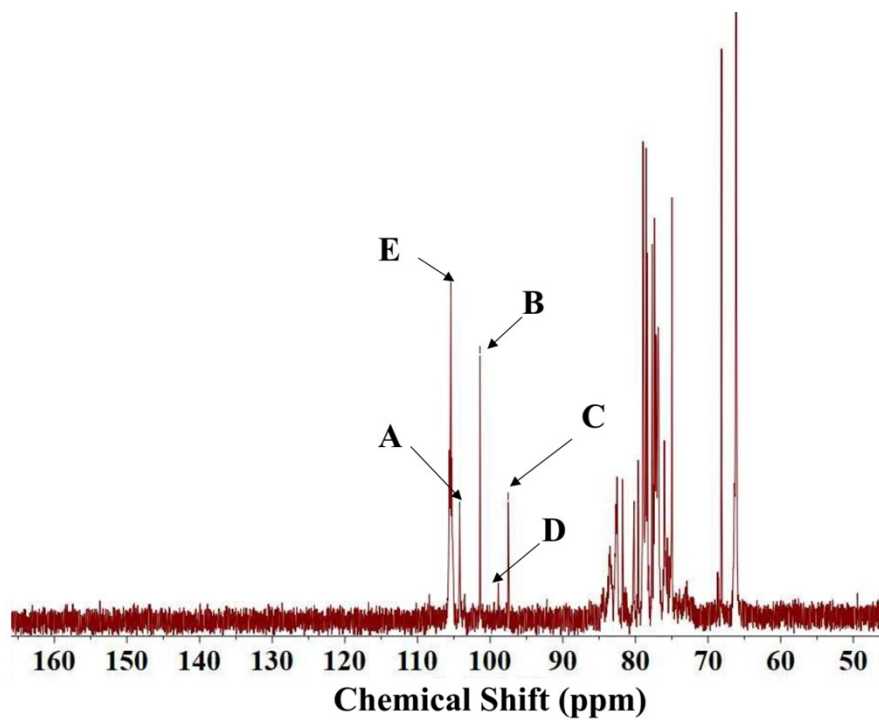



Fig. S6

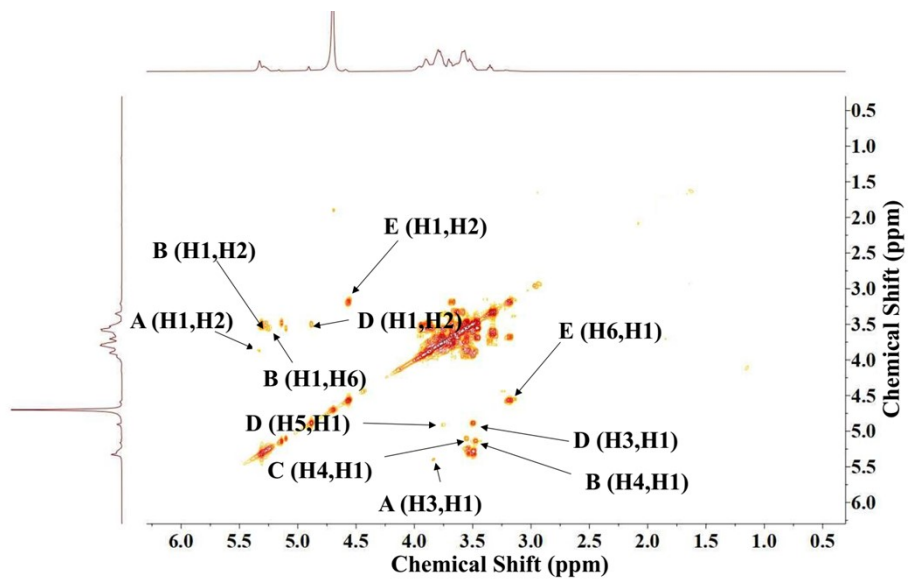

Fig. S7

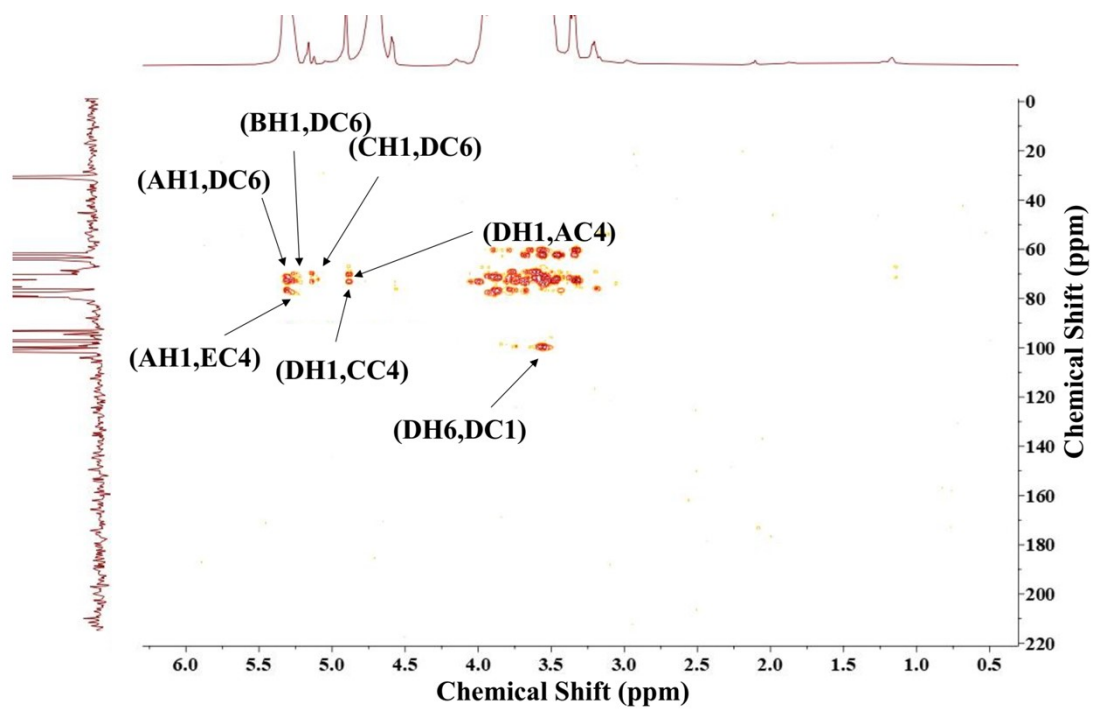

Fig.S8

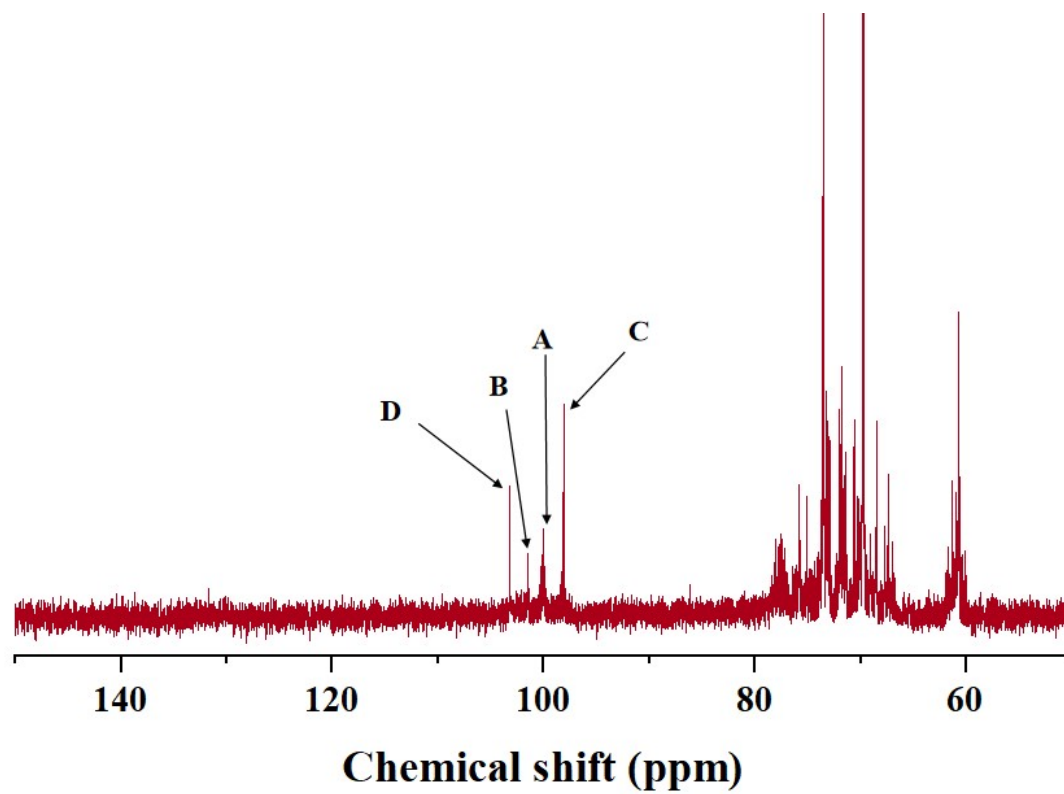

Fig.S9

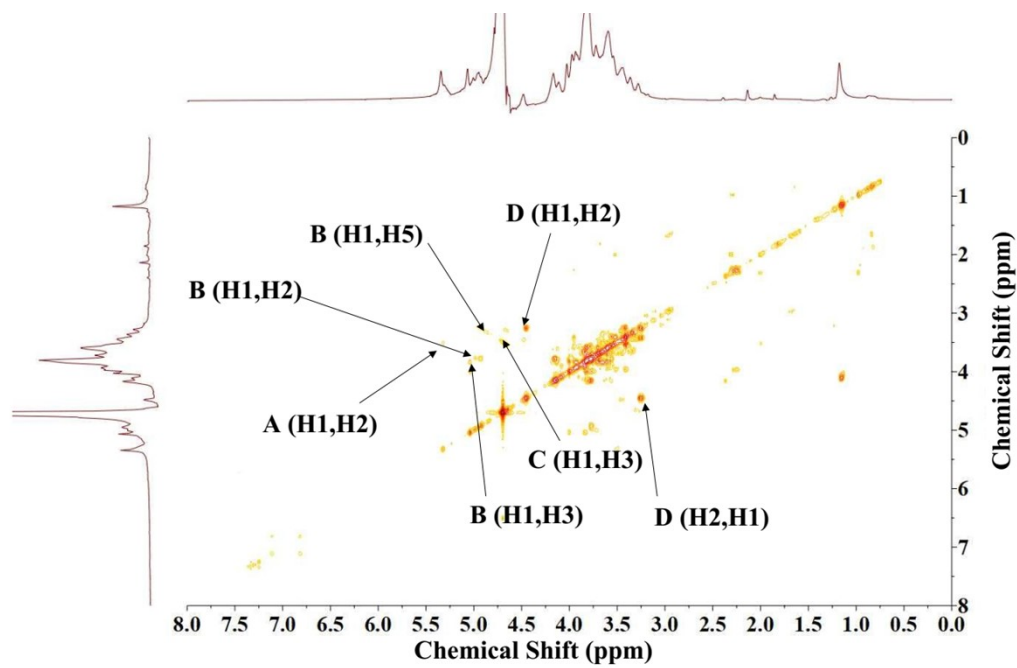

Fig.S10

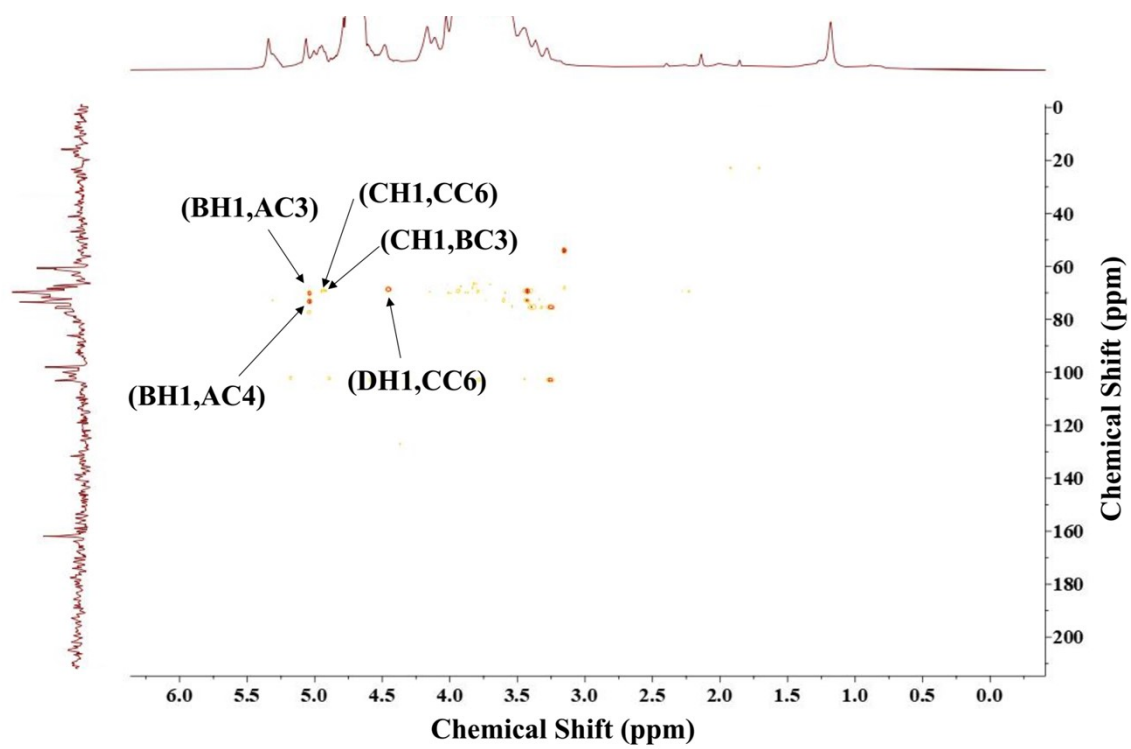

**Fig. S11**

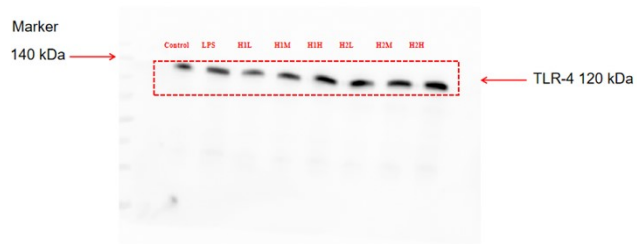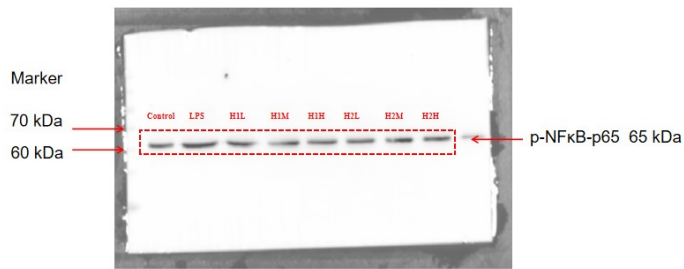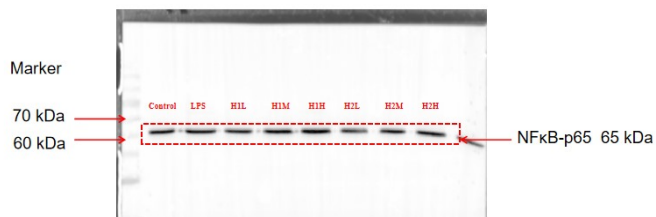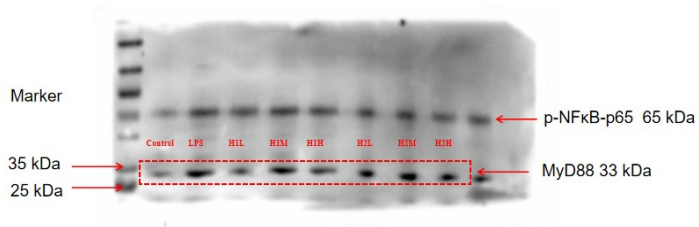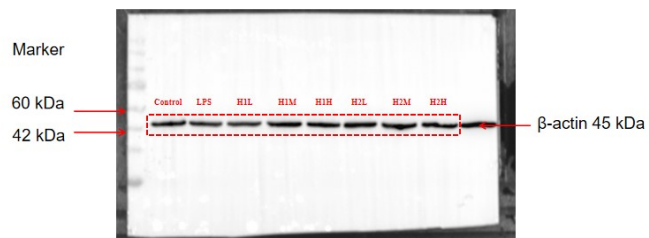

Supplement: d3fo05468c1.pdf [file d3fo05468c1.pdf]
